# Supplementary material for: Mn3O4 doped with highly dispersed Zr species: a new non-noble metal oxide with enhanced activity for three-way catalysis
Source: Royal Society of Chemistry journal article supplement (doi:10.1039/c6nj02272c), 2016-01-01
Supplement: c6nj02272c1.pdf [file c6nj02272c1.pdf]

## Electronic Supplementary Information (ESI):

### $Mn_3O_4$ Doped with Highly Dispersed Zr Species: A New Non-Noble Metal Oxide with Enhanced Activity for Three-Way Catalysis

Genyuan Zhao,<sup>a</sup> Jing Li,<sup>a</sup> Wenshuang Zhu,<sup>a</sup> Xueqin Ma,<sup>a</sup> Yonghua Guo,<sup>a</sup> Zhaohui Liu<sup>b</sup> and Yanzhao Yang<sup>\*a</sup>

<sup>a</sup>Key Laboratory for Special Functional Aggregate Materials of Education Ministry, School of Chemistry and Chemical Engineering, Shandong University, Jinan, 250100, P. R. China. E-mail: [yzyang@sdu.edu.cn](mailto:yzyang@sdu.edu.cn); Fax: +86-531-88564464; Tel: +86-531-88362988

<sup>b</sup>Shandong Academy of Agricultural Science, Jinan, 250100, P. R. China. E-mail: [liuzhaohuinky@163.com](mailto:liuzhaohuinky@163.com)

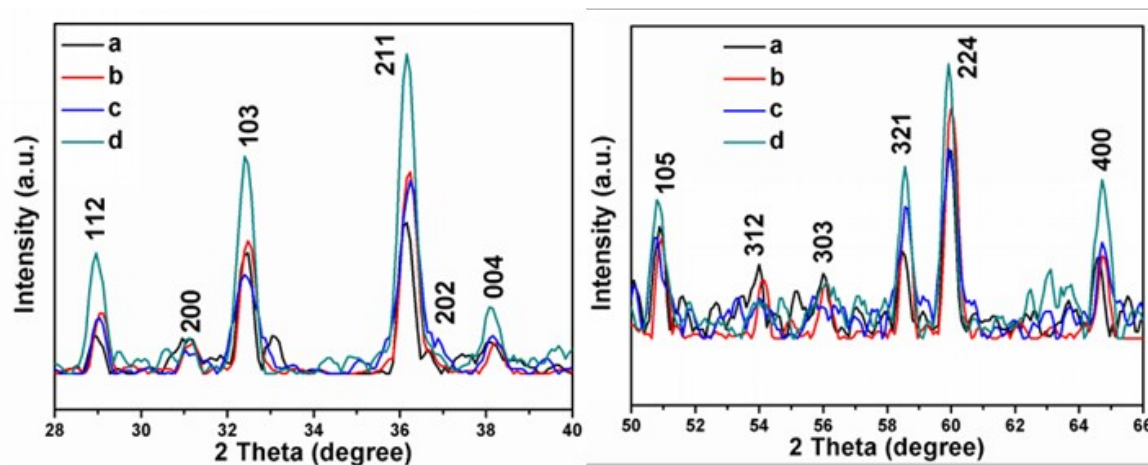

**Fig. S1** XRD patterns of the samples (a) ZM-0, (b) ZM-1, (c) ZM-2, (d) ZM-3 in 28°-40° and 50°-66°.

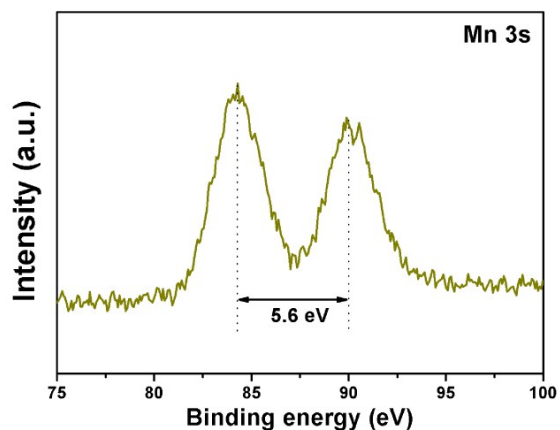

**Fig. S2** Representative XPS spectra of the ZM-2 samples: Mn 3s.

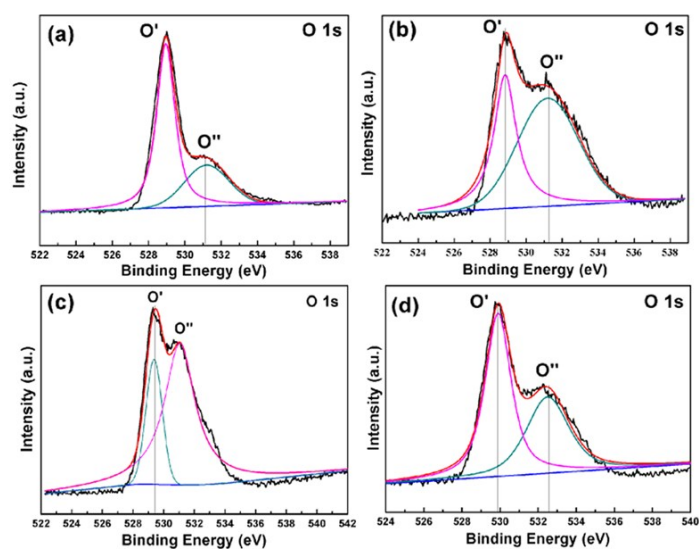

**Fig. S3** Representative XPS O1s spectra of different samples: (a) ZM-0, (b) ZM-1, (c) ZM-2, (d) ZM-3.

| Samples                     | ZM-0  | ZM-1   | ZM-2   | ZM-3   |
|-----------------------------|-------|--------|--------|--------|
| Area of H <sub>2</sub> -TPR | 821.8 | 1837.5 | 1905.9 | 1643.3 |

**Table S1** Areas of H<sub>2</sub>-TPR of different samples.

| Samples | CO Conversion   |                | NO Conversion   |                | C <sub>2</sub> H <sub>6</sub> Conversion |                |
|---------|-----------------|----------------|-----------------|----------------|------------------------------------------|----------------|
|         | T <sub>50</sub> | T <sub>C</sub> | T <sub>50</sub> | T <sub>C</sub> | T <sub>50</sub>                          | T <sub>C</sub> |
| ZM-0    | 248             | 439            | 366             | 459            | 461                                      | 500            |
| ZM-1    | 197             | 270            | 276             | 405            | 290                                      | 440            |
| ZM-2    | 168             | 228            | 241             | 344            | 311                                      | 400            |
| ZM-3    | 229             | 361            | 348             | 415            | 317                                      | 418            |

**Table S2** The catalytic activity date of samples.

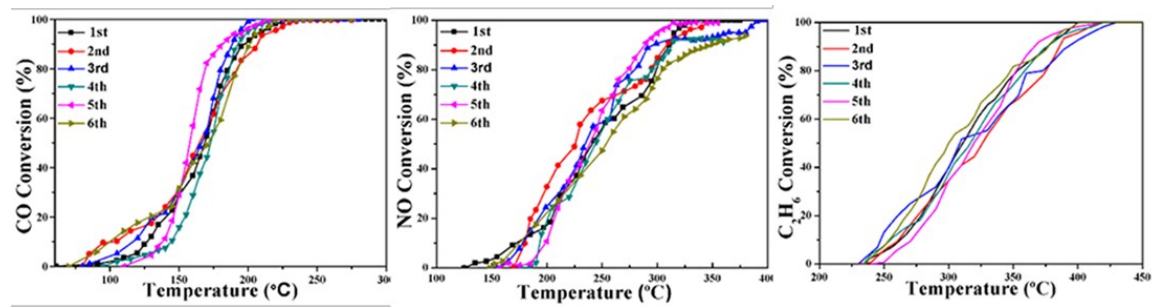

**Fig. S4** Catalytic performance of as-prepared ZM-2, which was pretreated under 900 °C for 24 h in different cycles.
